# Supplementary material
Source: HighWire-hosted journal article supplement (https://bmjopengastro.bmj.com/content/10/1/e001009)

### Supplementary material: Supporting tables and figures

Table 1. Main features of studies of foodborne illness in the UK, Australia, Canada and USA

| Feature                                                                 | UK                                                                                                                                                                                                                                                                                                                                                                                                                    | Australia                                                                                                                                                                                            | Canada                                                                                                                                                                                                                                                                                 | USA                                                                                                                                                                                                                         |
|-------------------------------------------------------------------------|-----------------------------------------------------------------------------------------------------------------------------------------------------------------------------------------------------------------------------------------------------------------------------------------------------------------------------------------------------------------------------------------------------------------------|------------------------------------------------------------------------------------------------------------------------------------------------------------------------------------------------------|----------------------------------------------------------------------------------------------------------------------------------------------------------------------------------------------------------------------------------------------------------------------------------------|-----------------------------------------------------------------------------------------------------------------------------------------------------------------------------------------------------------------------------|
| Year to which outputs relate                                            | 2009 & 2018                                                                                                                                                                                                                                                                                                                                                                                                           | 2010                                                                                                                                                                                                 | 2006                                                                                                                                                                                                                                                                                   | 2006                                                                                                                                                                                                                        |
| Data sources on which estimates of overall burden of illness are based. | Infectious Intestinal Disease (IID) estimates based on nationally representative, population-based prospective cohort study in 2009. Nationally representative, cross-sectional telephone surveys with 7-day and 28-day recall in 2009.                                                                                                                                                                               | National Gastroenteritis Survey II – a nationally representative, retrospective cross-sectional telephone survey conducted in 2008–2009 with 4-week recall.                                          | National Studies on Acute Gastrointestinal Illness (NSAGI) population surveys conducted in Ontario and British Columbia via retrospective, cross-sectional telephone surveys with 28-day recall.                                                                                       | Cross-sectional, retrospective telephone survey of self-reported acute diarrheal illness with 28-day recall in Foodborne Diseases Active Surveillance Network (FoodNet) at 10 US sites extrapolated to the whole of the US. |
| Case definitions.                                                       | IID defined as loose stools or clinically significant vomiting lasting less than 2 weeks, in the absence of a known non-infectious cause, preceded by a symptom-free period of 3 weeks. Vomiting was clinically significant if it occurred more than once in a 24 h period, and if it incapacitated the patient or was accompanied by other symptoms such as cramps or fever.                                         | Gastroenteritis defined as 3 or more episodes of diarrhoea or 2 or more episodes of vomiting within a 24-h period during the preceding 4 weeks in the absence of a non-infectious cause for illness. | Acute diarrheal defined as $\geq 3$ loose stools in 24 h with duration lasting $> 1$ day not resulting from pregnancy, medication, food allergy, and/or medical conditions previously diagnosed by a doctor (e.g. colitis, diverticulitis, Crohn's disease, irritable bowel syndrome). | Acute diarrheal illness defined as 3 or more loose stools in 24 hours lasting more than 1 day or resulting in restricted daily activities.                                                                                  |
| Adjustment for under-diagnosis?                                         | Estimates for 2009 did not need adjustments as they were measured as part of the IID2 study. <sup>10</sup> 2018 updates used adjustments based on this study and the change in confirmed laboratory for <i>Campylobacter</i> , <i>E. coli</i> O157, <i>Salmonella</i> , <i>Shigella</i> , <i>Cryptosporidium</i> , <i>Giardia</i> and rotavirus. For 2018, <i>C. Perfringens</i> , adenovirus, astrovirus, norovirus, | Yes                                                                                                                                                                                                  | Yes                                                                                                                                                                                                                                                                                    | Yes                                                                                                                                                                                                                         |

|                                                       |                                                                                                                                                                                                               |                     |                                           |                                                                             |
|-------------------------------------------------------|---------------------------------------------------------------------------------------------------------------------------------------------------------------------------------------------------------------|---------------------|-------------------------------------------|-----------------------------------------------------------------------------|
|                                                       | and sapovirus were scaled up based on population from the IID2 study, so were not adjusted for under-diagnosis. <i>E. coli</i> O157 and <i>Listeria monocytogenes</i> were assumed to have no under-diagnosis |                     |                                           |                                                                             |
| Estimating proportion of illnesses that are foodborne | Using outbreak surveillance data (excluding norovirus). For norovirus estimate based on Foodborne Disease Estimates for the United Kingdom in 2018 (Food Standards Agency, 2020a)                             | Expert elicitation. | Expert elicitation and literature review. | Using data from surveillance, risk factor studies, and a literature review. |
| Number of foodborne pathogens included                | 13                                                                                                                                                                                                            | 18 (IID only)       | 30                                        | 31                                                                          |
| Unknown agents                                        | Included                                                                                                                                                                                                      | Included            | Included                                  | Included                                                                    |

Table 2: Methodology to produce estimates by country

| Estimate                                 | UK                                                                                                                                                                                                                                                                                                                                                                                                                                | Australia                                                                                                                                                                                                                                                                                                                                                    | Canada                                                                                                                                                                                                                                                                                                                                                                            | USA                                                                                                                                                                                                                                                                                                                                                                   |
|------------------------------------------|-----------------------------------------------------------------------------------------------------------------------------------------------------------------------------------------------------------------------------------------------------------------------------------------------------------------------------------------------------------------------------------------------------------------------------------|--------------------------------------------------------------------------------------------------------------------------------------------------------------------------------------------------------------------------------------------------------------------------------------------------------------------------------------------------------------|-----------------------------------------------------------------------------------------------------------------------------------------------------------------------------------------------------------------------------------------------------------------------------------------------------------------------------------------------------------------------------------|-----------------------------------------------------------------------------------------------------------------------------------------------------------------------------------------------------------------------------------------------------------------------------------------------------------------------------------------------------------------------|
| Total IID (1)                            | Cohort Study                                                                                                                                                                                                                                                                                                                                                                                                                      | Telephone survey with 28 day recall                                                                                                                                                                                                                                                                                                                          | Telephone survey with 28 day recall                                                                                                                                                                                                                                                                                                                                               | Telephone survey with 28 day recall                                                                                                                                                                                                                                                                                                                                   |
| Total cases for individual pathogens (2) | Estimates based largely on cohort study. Of the 13 pathogens covered in detail in this paper, <i>Campylobacter</i> , <i>Salmonella non-typhoidal</i> , <i>Shigella</i> , <i>Cryptosporidium</i> , <i>Giardia</i> , norovirus and rotavirus were scaled up based on confirmed laboratory reports and underreporting rates from the cohort study. For <i>C. perfringens</i> , adenovirus, astrovirus, norovirus and sapovirus cases | Of the 12 pathogens covered in detail in this paper <i>C. perfringens</i> , <i>Campylobacter</i> , <i>Listeria monocytogenes</i> , <i>Salmonella non-typhoidal</i> , <i>Shigella</i> , <i>Cryptosporidium</i> and <i>Giardia</i> scaled up from surveillance data. Adenovirus, astrovirus, norovirus, rotavirus and sapovirus scaled down from Total IID (1) | Of the 13 pathogens covered in detail in this paper <i>Campylobacter</i> , <i>E. coli</i> O157, <i>Listeria monocytogenes</i> , <i>Salmonella non-typhoidal</i> , <i>Shigella</i> , <i>Cryptosporidium</i> and <i>Giardia</i> scaled up from surveillance data. <i>C. perfringens</i> , adenovirus, astrovirus, norovirus, rotavirus and sapovirus scaled down from Total IID (1) | Of the 12 pathogens covered in detail in this paper <i>C. perfringens</i> , <i>Campylobacter</i> , <i>E. coli</i> O157, <i>Listeria monocytogenes</i> , <i>Salmonella non-typhoidal</i> , <i>Shigella</i> , <i>Cryptosporidium</i> and <i>Giardia</i> scaled up from surveillance data. Adenovirus, norovirus, rotavirus and sapovirus scaled down from Total IID (1) |

|                                  |                                                                                                                                                                                                                                                                                                                            |                                                                                    |  |  |
|----------------------------------|----------------------------------------------------------------------------------------------------------------------------------------------------------------------------------------------------------------------------------------------------------------------------------------------------------------------------|------------------------------------------------------------------------------------|--|--|
|                                  | rates per 1,000 person-years as given in the cohort study were used. For <i>E. coli</i> O157 and <i>Listeria monocytogenes</i> confirmed laboratory numbers were used as there was assumed to be no underreporting                                                                                                         |                                                                                    |  |  |
| FBI for individual pathogens (3) | Estimates of total cases for each pathogen (2) multiplied by proportion attributed to food. Exception is norovirus which is based on a Quantitative Microbial Risk Assessment model.                                                                                                                                       | Estimates of IID for each pathogen (2) multiplied by proportion attributed to food |  |  |
| Total FBI (4)                    | Total of FBI for all individual pathogens (3) plus foodborne estimate for unattributed cases. IID estimate for unattributed cases is Total IID (1) minus sum of IID for individual IID pathogens (2). Foodborne proportion for unattributed cases is based on weighted foodborne proportions for individual IID pathogens. |                                                                                    |  |  |

Table 3: Infectious Intestinal Disease per 1 million population per annum

| Country and approach                       | Annual rate per 1 million population |                            |                            |
|--------------------------------------------|--------------------------------------|----------------------------|----------------------------|
|                                            | Mean                                 | Lower<br>90% Cred.<br>Int. | Upper<br>90% Cred.<br>Int. |
| Australia - telephone survey 28 day recall | 746,479                              | 643,192                    | 845,070                    |
| Canada - telephone survey 28 day recall    | 630,500                              | 594,973                    | 666,432                    |
| USA - telephone survey 28 day recall       | 612,000                              | 581,786                    | 642,214                    |
| UK - cohort study                          | 274,512                              | 257,230                    | 292,506                    |
| UK - telephone survey 7 day recall         | 1,548,929                            | 1,178,609                  | 1,985,067                  |
| UK - telephone survey 28 day recall        | 542,370                              | 393,532                    | 722,424                    |
| Sweden - cohort study                      | 360,000                              | 326,000                    | 395,000                    |
| Netherlands - cohort study                 | 283,000                              | 252,000                    | 315,000                    |

Table 4: Foodborne illness per 1 million population per annum

| Country and approach                       | Annual rate per 1 million population |                            |                            |
|--------------------------------------------|--------------------------------------|----------------------------|----------------------------|
|                                            | Mean                                 | Lower<br>90% Cred.<br>Int. | Upper<br>90% Cred.<br>Int. |
| Australia - telephone survey 28 day recall | 193,005                              | 109,390                    | 300,000                    |
| Canada - telephone survey 28 day recall    | 123,077                              | 95,385                     | 153,846                    |
| USA - telephone survey 28 day recall       | 159,802                              | 95,849                     | 237,906                    |
| UK - cohort study                          | 35,979                               | 28,224                     | 45,215                     |
| UK - telephone survey 7 day recall         | 202,985                              | 140,823                    | 281,015                    |
| UK - telephone survey 28 day recall        | 71,079                               | 47,415                     | 101,176                    |

Figure S1: FBI rates per 1 million population per annum – sensitivity analysis (90% credible intervals shown with the mean)

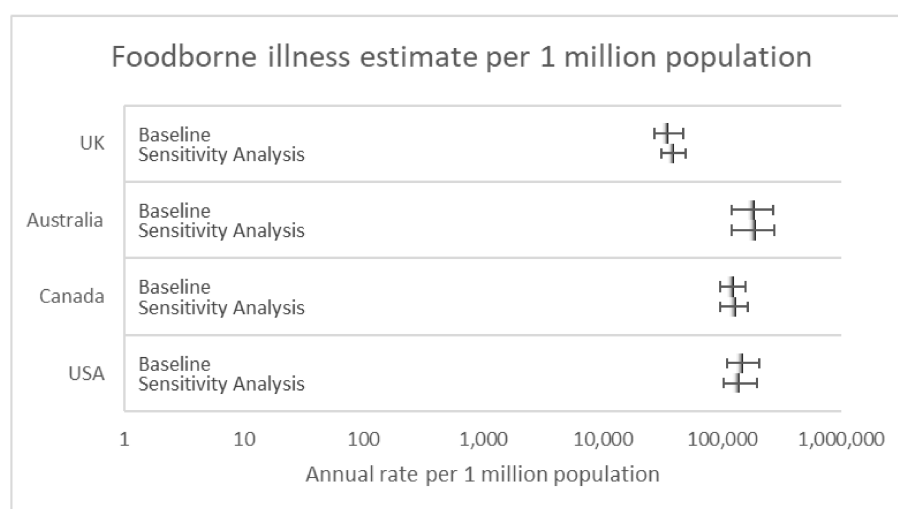

The baseline is based on the models as described in the published papers. As the models have been re-run there are slight differences to previously published figures. Sensitivity analysis is based on using just the 10 IID pathogens common to all four studies.

Table 5: Proportion of estimated FBI from known pathogens by IID pathogens common to all 4 studies, other IID pathogens (those included in some studies) and non-IID pathogens

| % FBI by pathogen category         | UK    | Australia | Canada | USA   |
|------------------------------------|-------|-----------|--------|-------|
| % FBI from 10 common IID pathogens | 98.4% | 64.7%     | 91.0%  | 91.7% |
| % FBI from other IID pathogens     | 1.6%  | 35.3%     | 8.4%   | 7.2%  |
| % FBI from non-IID pathogens       | 0.02% | NA        | 0.6%   | 1.1%  |

Table 6: Estimated proportion of cases attributable to food for unspecified agents

| Proportions based on:                            | UK    |                      |                      | Australia |                      |                      | Canada |                      |                      | USA   |                      |                      |
|--------------------------------------------------|-------|----------------------|----------------------|-----------|----------------------|----------------------|--------|----------------------|----------------------|-------|----------------------|----------------------|
|                                                  | Mean  | Lower 90% Cred. Int. | Upper 90% Cred. Int. | Mean      | Lower 90% Cred. Int. | Upper 90% Cred. Int. | Mean   | Lower 90% Cred. Int. | Upper 90% Cred. Int. | Mean  | Lower 90% Cred. Int. | Upper 90% Cred. Int. |
| IID pathogens used in individual country's study | 13.1% | 10.4%                | 16.3%                | 25.5%     | 16.6%                | 35.9%                | 20.2%  | 15.4%                | 24.9%                | 25.8% | 21.5%                | 30.2%                |
| 10 IID Pathogens common to all 4 studies         | 14.4% | 11.4%                | 18.0%                | 26.3%     | 16.5%                | 37.0%                | 20.8%  | 15.6%                | 26.1%                | 24.4% | 20.2%                | 29.0%                |

Table 7: Infectious Intestinal Disease per 1 million population per annum for 11 pathogens where estimates are available for all four countries

| Country   | Annual rate per 1 million population |                      |                      |
|-----------|--------------------------------------|----------------------|----------------------|
|           | Mean                                 | Lower 90% Cred. Int. | Upper 90% Cred. Int. |
| UK        | 94,855                               | 84,808               | 105,689              |
| Australia | 100,860                              | 82,505               | 121,332              |
| Canada    | 220,306                              | 201,342              | 240,021              |
| USA       | 118,152                              | 91,577               | 149,176              |

Figure S2: IID rates per 1 million population per annum for the 11 pathogens common to all 4 studies (90% credible intervals shown with the mean)

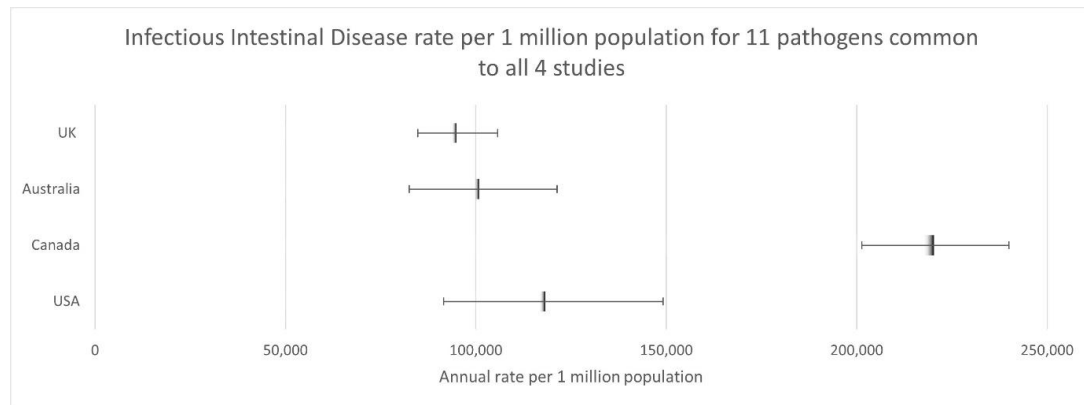

Note: Figures are based on the sum of the estimates for the 11 pathogens and do not use total IID estimates from either the telephone surveys or cohort studies.

Table 8: Foodborne illness per 1 million population per year for 11 pathogens where estimates are available for all four countries

| Country   | Annual rate per 1 million population |                         |                         |
|-----------|--------------------------------------|-------------------------|-------------------------|
|           | Mean                                 | Lower 90%<br>Cred. Int. | Upper 90%<br>Cred. Int. |
| UK        | 13,676                               | 10,775                  | 17,297                  |
| Australia | 26,450                               | 16,188                  | 38,754                  |
| Canada    | 45,798                               | 33,928                  | 58,266                  |
| USA       | 28,752                               | 20,152                  | 39,104                  |

Figure S3: FBI rates per 1 million population per annum for the 11 pathogens common to all 4 studies (90% credible intervals shown with the mean)

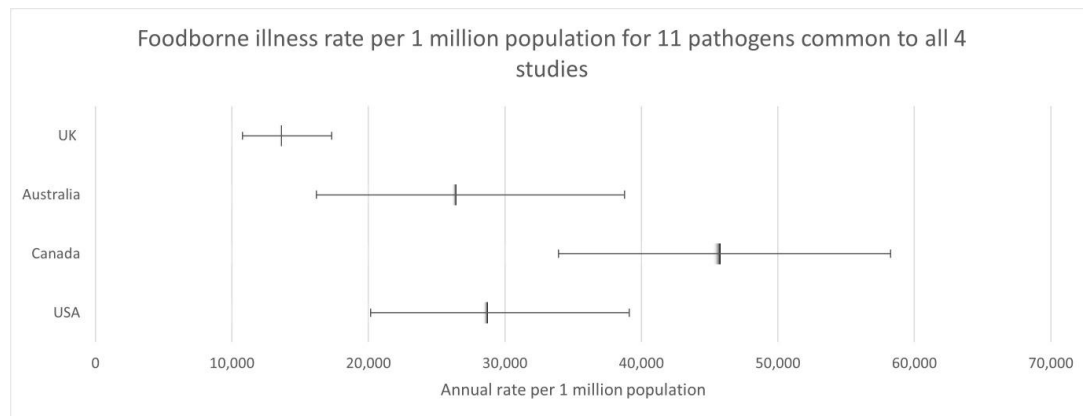

Note: Figures are based on the sum of the estimates for the 11 pathogens and do not use total IID estimates from either the telephone surveys or cohort studies.



Table 9: Infectious Intestinal Disease per 1 million population per year

| Pathogen                        | UK     |                      |                      | Australia |                      |                      | Canada  |                      |                      | USA    |                      |                      |
|---------------------------------|--------|----------------------|----------------------|-----------|----------------------|----------------------|---------|----------------------|----------------------|--------|----------------------|----------------------|
|                                 | Mean   | Lower 90% Cred. Int. | Upper 90% Cred. Int. | Mean      | Lower 90% Cred. Int. | Upper 90% Cred. Int. | Mean    | Lower 90% Cred. Int. | Upper 90% Cred. Int. | Mean   | Lower 90% Cred. Int. | Upper 90% Cred. Int. |
| <b>Bacteria</b>                 |        |                      |                      |           |                      |                      |         |                      |                      |        |                      |                      |
| <i>C. perfringens</i>           | 1,695  | 671                  | 3,366                | 785       | 35                   | 2,465                | 5,446   | 2,930                | 8,314                | 3,221  | 642                  | 8,306                |
| <i>Campylobacter</i>            | 9,748  | 6,535                | 13,809               | 10,950    | 6,850                | 17,415               | 7,131   | 4,440                | 9,503                | 3,502  | 1,399                | 6,673                |
| <i>E. coli</i> O157             | 13     | 13                   | 13                   | NA        | NA                   | NA                   | 520     | 214                  | 913                  | 309    | 78                   | 746                  |
| <i>Listeria monocytogenes</i>   | 3      | 3                    | 3                    | 7         | 3                    | 10                   | 7       | 5                    | 10                   | 5      | 2                    | 11                   |
| <i>Salmonella non typhoidal</i> | 716    | 145                  | 1,914                | 2,650     | 1,515                | 4,650                | 3,366   | 2,293                | 4,769                | 3,633  | 2,266                | 5,903                |
| <i>Shigella</i>                 | 108    | 108                  | 108                  | 140       | 75                   | 260                  | 205     | 115                  | 336                  | 1,399  | 264                  | 4,016                |
| <b>Parasites</b>                |        |                      |                      |           |                      |                      |         |                      |                      |        |                      |                      |
| <i>Cryptosporidium</i>          | 745    | 151                  | 1,990                | 850       | 365                  | 1,860                | 779     | 441                  | 1,414                | 2,248  | 487                  | 6,482                |
| <i>Giardia</i>                  | 1,310  | 311                  | 3,295                | 1,560     | 920                  | 2,665                | 3,339   | 2,170                | 4,884                | 3,710  | 2,704                | 4,990                |
| <b>Viruses</b>                  |        |                      |                      |           |                      |                      |         |                      |                      |        |                      |                      |
| Adenovirus                      | 10,379 | 7,187                | 14,342               | 4,150     | 1,300                | 9,675                | 23,009  | 17,750               | 28,604               | NA     | NA                   | NA                   |
| Astrovirus                      | 5,528  | 3,290                | 8,540                | 3,150     | 1,000                | 7,250                | 11,768  | 8,023                | 15,895               | 10,340 | 7,859                | 12,822               |
| Norovirus                       | 47,078 | 40,436               | 54,369               | 72,500    | 57,100               | 90,550               | 104,000 | 92,398               | 116,260              | 69,414 | 44,228               | 99,402               |
| Rotavirus                       | 1,712  | 1,221                | 2,311                | 2,100     | 875                  | 4,260                | 26,161  | 20,468               | 32,173               | 10,340 | 7,858                | 12,822               |
| Sapovirus                       | 26,212 | 20,987               | 32,188               | 3,800     | 3,000                | 4,800                | 61,217  | 49,826               | 67,545               | 10,340 | 7,858                | 12,822               |

Table 10: Estimates of Infectious Intestinal Disease for certain pathogens for Canada and UK per 1 million population per year. Based on using different estimates of overall IID for Canada.

| Pathogen   | UK                    |                      |                      | Canada based on UK Cohort study as in paper |                      |                      | Canada based on UK Cohort Study re-modelled |                      |                      | Canada based on UK Telephone Survey with 28 day recall |                      |                      |
|------------|-----------------------|----------------------|----------------------|---------------------------------------------|----------------------|----------------------|---------------------------------------------|----------------------|----------------------|--------------------------------------------------------|----------------------|----------------------|
|            | Mean                  | Lower 90% Cred. Int. | Upper 90% Cred. Int. | Mean                                        | Lower 90% Cred. Int. | Upper 90% Cred. Int. | Mean                                        | Lower 90% Cred. Int. | Upper 90% Cred. Int. | Mean                                                   | Lower 90% Cred. Int. | Upper 90% Cred. Int. |
|            | <i>C. perfringens</i> | 1,695                | 671                  | 3,366                                       | 5,446                | 2,647                | 8,784                                       | 4,439                | 1,861                | 7,661                                                  | 2,353                | 933                  |
| Adenovirus | 10,379                | 7,187                | 14,342               | 23,010                                      | 17,047               | 29,533               | 24,476                                      | 17,618               | 32,100               | 12,990                                                 | 8,362                | 18,230               |
| Astrovirus | 5,528                 | 3,290                | 8,540                | 11,768                                      | 7,573                | 16,558               | 13,237                                      | 8,317                | 18,874               | 7,018                                                  | 4,041                | 10,487               |
| Sapovirus  | 26,212                | 20,987               | 32,188               | 58,417                                      | 48,622               | 69,040               | 61,077                                      | 49,235               | 73,945               | 32,433                                                 | 22,768               | 43,299               |

Note this table gives estimates for Canada based on the UK study as they appear in the published paper and the those re-created using the models. Both figures have been provided to illustrate that the models for Canada re-created for this study give similar but not identical to those published. Only the published figures are given in figure 6 in the main paper.

Table 11: Foodborne illness per 1 million population per year

| Pathogen                        | UK    |                      |                      | Australia |                      |                      | Canada |                      |                      | USA    |                      |                      |
|---------------------------------|-------|----------------------|----------------------|-----------|----------------------|----------------------|--------|----------------------|----------------------|--------|----------------------|----------------------|
|                                 | Mean  | Lower 90% Cred. Int. | Upper 90% Cred. Int. | Mean      | Lower 90% Cred. Int. | Upper 90% Cred. Int. | Mean   | Lower 90% Cred. Int. | Upper 90% Cred. Int. | Mean   | Lower 90% Cred. Int. | Upper 90% Cred. Int. |
| Bacteria                        |       |                      |                      |           |                      |                      |        |                      |                      |        |                      |                      |
| <i>C. perfringens</i>           | 1,443 | 562                  | 2,885                | 765       | 130                  | 2,350                | 5,445  | 2,930                | 8,313                | 3,231  | 643                  | 8,238                |
| <i>Campylobacter</i>            | 4,706 | 2,247                | 7,831                | 8,400     | 5,050                | 13,650               | 4,472  | 2,944                | 6,553                | 2,856  | 1,127                | 5,388                |
| <i>E. coli</i> O157             | 7     | 5                    | 9                    | NA        | NA                   | NA                   | 395    | 161                  | 700                  | 211    | 59                   | 500                  |
| <i>Listeria monocytogenes</i>   | 2     | 2                    | 3                    | 7         | 3                    | 10                   | 5      | 4                    | 9                    | 5      | 2                    | 11                   |
| <i>Salmonella non typhoidal</i> | 647   | 131                  | 1,731                | 1,850     | 1,000                | 3,350                | 2,693  | 1,810                | 3,862                | 3,437  | 2,223                | 5,618                |
| <i>Shigella</i>                 | 28    | 3                    | 67                   | 16        | 6                    | 40                   | 37     | 17                   | 66                   | 439    | 82                   | 1,253                |
| Parasites                       |       |                      |                      |           |                      |                      |        |                      |                      |        |                      |                      |
| <i>Cryptosporidium</i>          | 47    | 7                    | 139                  | 80        | 57                   | 320                  | 71     | 31                   | 139                  | 193    | 40                   | 558                  |
| <i>Giardia</i>                  | 285   | 42                   | 821                  | 175       | 35                   | 490                  | 239    | 146                  | 365                  | 257    | 171                  | 367                  |
| Viruses                         |       |                      |                      |           |                      |                      |        |                      |                      |        |                      |                      |
| Adenovirus                      | 213   | 60                   | 450                  | 80        | 25                   | 215                  | 115    | 42                   | 197                  | NA     | NA                   | NA                   |
| Astrovirus                      | 45    | 11                   | 101                  | 60        | 20                   | 160                  | 59     | 21                   | 105                  | 52     | 19                   | 89                   |
| Norovirus                       | 5,768 | 5,768                | 5,768                | 12,920    | 3,620                | 26,300               | 32,238 | 20,910               | 44,125               | 18,267 | 10,793               | 27,791               |
| Rotavirus                       | 35    | 10                   | 74                   | 40        | 15                   | 95                   | 131    | 48                   | 222                  | 52     | 19                   | 89                   |
| Sapovirus                       | 669   | 466                  | 915                  | 700       | 350                  | 1,150                | 292    | 109                  | 483                  | 52     | 19                   | 89                   |

Table 12: Proportion of cases attributed to food by country by pathogen

| Pathogen                        | UK   |                      |                      | Australia |                      |                      | Canada |                      |                      | USA  |                      |                      |
|---------------------------------|------|----------------------|----------------------|-----------|----------------------|----------------------|--------|----------------------|----------------------|------|----------------------|----------------------|
|                                 | Mean | Lower 90% Cred. Int. | Upper 90% Cred. Int. | Mean      | Lower 90% Cred. Int. | Upper 90% Cred. Int. | Mean   | Lower 90% Cred. Int. | Upper 90% Cred. Int. | Mean | Lower 90% Cred. Int. | Upper 90% Cred. Int. |
| <b>Bacteria</b>                 |      |                      |                      |           |                      |                      |        |                      |                      |      |                      |                      |
| <i>C. perfringens</i>           | 85%  | 73%                  | 95%                  | 98%       | 86%                  | 100%                 | 100%   | 100%                 | 100%                 | 100% | 100%                 | 100%                 |
| <i>Campylobacter</i>            | 48%  | 26%                  | 71%                  | 77%       | 62%                  | 89%                  | 68%    | 59%                  | 77%                  | 80%  | 76%                  | 84%                  |
| <i>E. coli</i> O157             | 53%  | 37%                  | 68%                  | NA        | NA                   | NA                   | 76%    | 66%                  | 85%                  | 68%  | 62%                  | 73%                  |
| <i>Listeria monocytogenes</i>   | 93%  | 87%                  | 98%                  | 98%       | 90%                  | 100%                 | 84%    | 77%                  | 91%                  | 100% | 100%                 | 100%                 |
| <i>Salmonella non typhoidal</i> | 90%  | 86%                  | 94%                  | 72%       | 53%                  | 86%                  | 80%    | 73%                  | 87%                  | 94%  | 92%                  | 95%                  |
| <i>Shigella</i>                 | 26%  | 3%                   | 62%                  | 12%       | 5%                   | 23%                  | 18%    | 11%                  | 25%                  | 31%  | 26%                  | 37%                  |
| <b>Parasites</b>                |      |                      |                      |           |                      |                      |        |                      |                      |      |                      |                      |
| <i>Cryptosporidium</i>          | 6%   | 2%                   | 12%                  | 10%       | 1%                   | 27%                  | 9%     | 5%                   | 13%                  | 8%   | 7%                   | 10%                  |
| <i>Giardia</i>                  | 22%  | 7%                   | 41%                  | 6%        | 1%                   | 50%                  | 7%     | 6%                   | 9%                   | 7%   | 6%                   | 9%                   |
| <b>Viruses</b>                  |      |                      |                      |           |                      |                      |        |                      |                      |      |                      |                      |
| Adenovirus                      | 2%   | 1%                   | 4%                   | 2%        | 1%                   | 3%                   | 1%     | 0%                   | 1%                   | NA   | NA                   | NA                   |
| Astrovirus                      | 1%   | 0%                   | 2%                   | 2%        | 1%                   | 3%                   | 1%     | 0%                   | 1%                   | 1%   | 0%                   | 1%                   |
| Norovirus                       | 12%  | 11%                  | 14%                  | 18%       | 5%                   | 35%                  | 31%    | 20%                  | 42%                  | 26%  | 22%                  | 31%                  |
| Rotavirus                       | 2%   | 1%                   | 4%                   | 2%        | 1%                   | 3%                   | 1%     | 0%                   | 1%                   | 1%   | 0%                   | 1%                   |
| Sapovirus                       | 3%   | 2%                   | 3%                   | 18%       | 5%                   | 35%                  | 1%     | 0%                   | 1%                   | 1%   | 0%                   | 1%                   |

Figure S4: Proportion of cases attributed to food by pathogen by country (90% credible intervals shown with the mean)

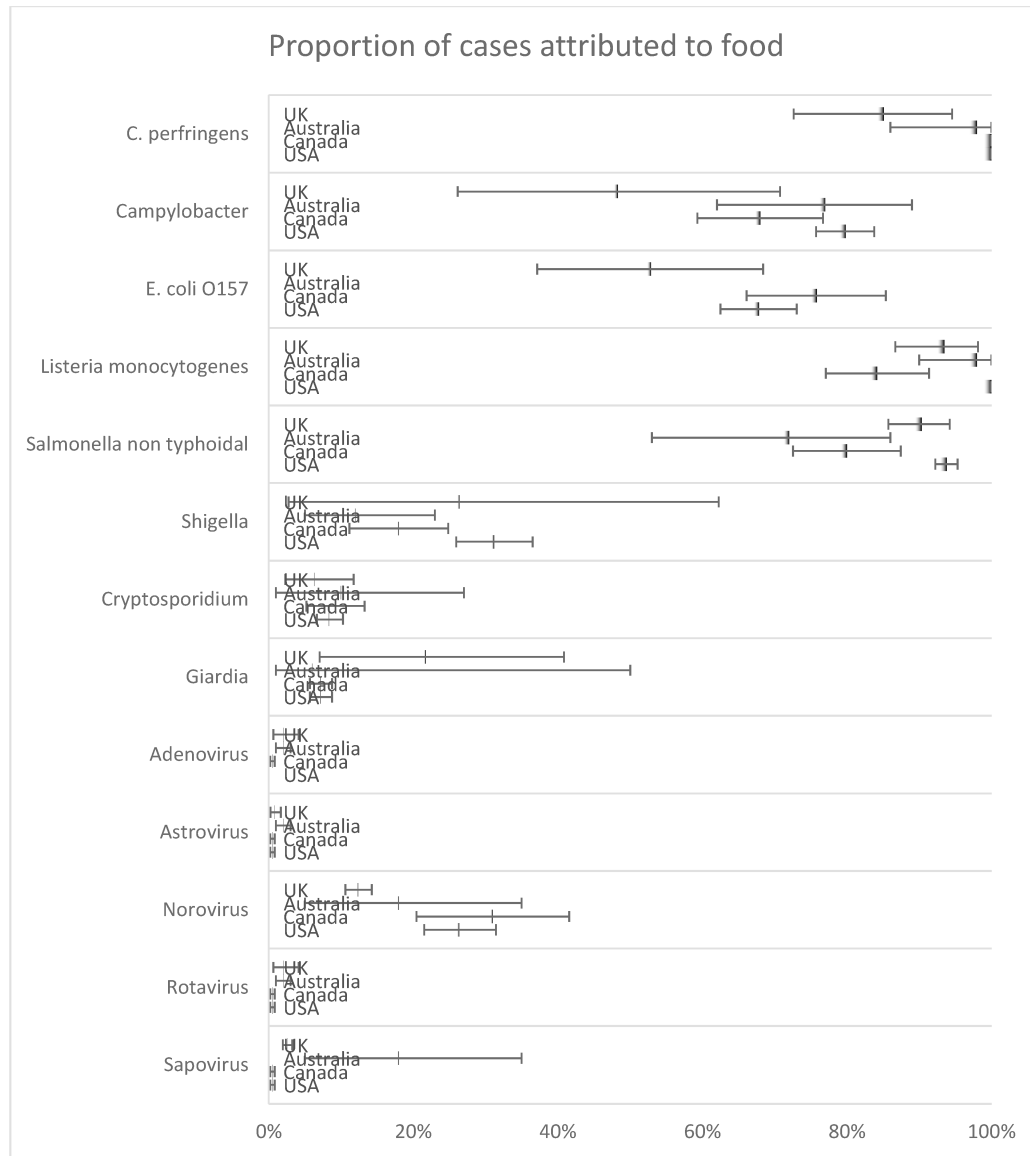

Supplement: inline-supplementary-material-1 [file inline-supplementary-material-1.pdf]
